1  
2  
3  
4  
5  
6  
7  
8  
9  
10  
11  
12  
13  
14  
15  
16  
17

**Juvenile hormone, but not nutrition or social cues, affects reproductive maturation in solitary alkali bees (*Nomia melanderi*)**

Karen M. Kapheim\* and Makenna M. Johnson

Utah State University, Department of Biology, 5305 Old Main Hill, Logan, UT 84322, USA

\*Correspondence: Karen M. Kapheim ([karen.kapheim@usu.edu](mailto:karen.kapheim@usu.edu))

**Running title:** Reproductive physiology of a solitary bee

**Key words:** alkali bees, Dufour's gland, nutrition, juvenile hormone, reproduction

## 18 **Abstract**

19 Eusocial insect colonies are defined by extreme variation in reproductive activity among  
20 castes, but the ancestral conditions from which this variation arose are unknown.  
21 Investigating the factors that contribute to variation in reproductive physiology among  
22 solitary insects that are closely related to social species can help to fill this gap. We  
23 experimentally tested the role of nutrition, juvenile hormone, and social cues on  
24 reproductive maturation in solitary alkali bees (Halictidae: *Nomia melanderi*). We find that  
25 alkali bee females emerge from overwintering with small Dufour's glands and small ovaries,  
26 containing oocytes in the early stages of development. Oocyte maturation occurs rapidly,  
27 and is staggered between the two ovaries. Lab-reared females reached reproductive  
28 maturity without access to mates or nesting opportunities, and many had resorbed oocytes.  
29 Initial activation of these reproductive structures does not depend on pollen consumption,  
30 though dietary protein or lipids may be necessary for long-term reproductive activity. JH is  
31 likely to be a limiting factor in alkali bee reproductive activation, as females treated with JH  
32 were more likely to develop mature oocytes and Dufour's glands. Unlike for related social  
33 bees, the effects of JH were not suppressed by the presence of older, reproductive females.  
34 These results provide important insight into the factors that influence reproductive activity  
35 in an important native pollinator, and those that may have been particularly important in  
36 the evolution of reproductive castes.

37

## 38 **Introduction**

39 Complex social organization, such as that observed among honey bees (*Apis mellifera*), ants  
40 (Formicidae), and vespid wasps (Vespidae), is marked by a high degree of variance in  
41 reproductive activity among individuals within a colony. This variation is demarcated among  
42 reproductive castes, whereby workers do not reproduce, despite engaging in maternal  
43 behaviors (e.g., brood feeding or nest defense), and queens reproduce while largely  
44 refraining from brood care (Michener, 1974). Workers of many social insect species have  
45 similar reproductive anatomy to queens (e.g., ovaries, spermathecae, glands, ovipositor),  
46 yet remain functionally sterile. This suggests the factors that influence the function of these  
47 structures differ between queens and workers, and that understanding this variation may  
48 provide insights into the physiological basis for the origin of social insect castes.

49

50 The factors that differentially influence reproductive activation among social insect castes  
51 include nutritional, endocrine, and social cues (Kapheim, 2017). For example, both queens  
52 and workers acting as nurses within a honey bee colony consume a protein-rich diet, but

53 this protein contributes to egg-production only in the queens (Winston, 1987). Similarly,  
54 treatment with the juvenile hormone (JH) analog methoprene leads to accelerated ovarian  
55 development in queen paper wasps (*Polistes canadensis*), but instead increases foraging  
56 activity in workers (Giray et al., 2005). Finally, social cues, such as aggression from the  
57 queen, can repress endocrine pathways, and thus ovary maturation, in worker bumble bees  
58 (*Bombus impatiens*) and social halictid bees (*Megalopta genalis*), but aggression directed  
59 from workers toward queens does not have the same effect (Kapheim et al., 2016; Padilla  
60 et al., 2016; Smith et al., 2009). Understanding how these differences in sensitivity to  
61 physiological and environmental cues arise among females and contribute to variation in  
62 reproductive activity is thus key to understanding the origins of social insect castes.

63  
64 One approach toward this goal is to investigate how these factors contribute to variation in  
65 reproductive development in solitary species representative of the ancestors that gave rise  
66 to social castes. We conducted two experiments to determine how variation in nutrition, JH,  
67 and the social environment influence reproductive development in a solitary bee that shares  
68 similarities with the ancestors of social bees. Alkali bees (*Nomia melanderi*) are semi-  
69 managed, native pollinators of alfalfa seed crops that range throughout the western U.S.A.  
70 (Cane, 2008). This species belongs to a basal subfamily of Halictidae (Nomiinae) in which  
71 eusociality has never evolved, but they are closely related to the Halictinae, in which social  
72 behavior is highly variable (Michener, 1974; Michener, 2007), and eusociality evolved at  
73 least twice (Brady et al., 2006; Danforth et al., 2008; Gibbs et al., 2012). Bees in the family  
74 Halictidae shared a common ancestor with the Apidae (e.g., bumble bees, honey bees)  
75 approximately 115 mya, and may thus have important differences in reproductive  
76 physiology (Cardinal and Danforth, 2013). Alkali bees are considered solitary, because each  
77 female has her own nest, but they often nest in close proximity to other females in large  
78 aggregations (Cane, 2008; Wcislo and Engel, 1996). Importantly, these bees exhibit  
79 extended maternal behavior, characteristic of that which was a necessary pre-adaptation to  
80 sociality (Batra, 1970; Batra and Bohart, 1969; Schwarz et al., 2007). As such,  
81 understanding the factors that influence reproductive physiology in this species can shed  
82 light on the physiological basis for social evolution.

83  
84 Little is known about the factors that influence alkali bee reproductive development.  
85 However, a recent study demonstrated that JH accelerates reproductive maturation  
86 (Kapheim and Johnson, 2017). It was also recently documented that adult female alkali  
87 bees consume pollen on a daily basis (Cane et al., 2016). Pollen is the primary source of

88 dietary protein and lipids for bees (Roulston and Cane, 2000), but whether pollen  
89 consumption is necessary for reproduction has not been experimentally tested. We  
90 investigated two aspects of reproductive physiology – oocyte growth, which requires  
91 proteins for egg-yolk (Badisco et al., 2013) and maturation of the Dufour’s gland, which  
92 secretes lipids used for nest cell construction (Cane, 1981). Our results reveal that  
93 vitellogenesis can occur rapidly among newly emerged females, even without mating or  
94 nesting opportunity. The initiation of oogenesis and Dufour’s gland maturation does not  
95 require dietary protein, and females treated with JH were more likely to reach reproductive  
96 maturity. This response to JH was not affected by variation in the social environment (i.e.,  
97 co-housing with an older, reproductive female). This provides important insight into the  
98 physiological foundation from which social insect castes evolved, as well as the reproductive  
99 physiology of an important pollinator.

100

## 101 **Methods**

### 102 *Collections*

103 This study took place in Touchet, WA, U.S.A, where alkali bees nest in large soil beds near  
104 alfalfa seed fields (Cane, 2008). Alkali bees overwinter as prepupae in below-ground nests,  
105 and emerge as adults upon completion of development the following summer. We trapped  
106 newly eclosed adult females from 27 May-8 June 2016 by placing emergence traps on 3 bee  
107 beds prior to the start of emergence. Traps were checked at least 3 times a day, and new  
108 bees were transferred back to the laboratory in individually labeled 15 ml tubes placed  
109 inside a cooler with a single ice pack placed under a layer of cardboard.

110

### 111 *Experiment 1 – nutrition effects on reproductive physiology*

112 Upon arrival to the laboratory, bees were chilled at 4°C for 5 min and randomly assigned to  
113 a treatment group: sugar water only (sterile 35% sucrose solution), sugar water with pollen  
114 (2.5 g sterile, finely-ground, honey-bee pollen in 30 ml of sterile 35% sucrose solution),  
115 sugar water with pollen plus 4 sprigs of fresh, untripped alfalfa flowers. (Bees were  
116 observed manipulating these flowers to release pollen on a regular basis throughout the  
117 experiment.) Bees were placed in perforated plastic deli containers (72 mm x 90 mm lower  
118 diameter x 113 mm upper diameter), and reared in the lab for 10 days (d). Sugar water or  
119 pollen mix and alfalfa flowers were changed daily. Pollen-sugar mixture was shaken  
120 vigorously before each feeding to achieve homogeneity, and then pipetted into feeding  
121 troughs made from 1.5 ml microcentrifuge tubes with the tapered tip removed. The cages  
122 were kept at 22-28°C, 40-85% RH and full spectrum lighting 13 L: 11 D, as has been

123 previously described (Kapheim and Johnson, 2017). At the end of the 10 d rearing period,  
124 bees were chilled for 3 min at 4°C, placed in individually-labeled tubes, and flash-frozen in  
125 liquid nitrogen.

126

127 We also collected newly emerged females and reproductive females of unknown age for  
128 comparison to lab-reared females. Newly emerged females were collected from emergence  
129 traps as described above, but were flash-frozen immediately upon return to the laboratory.  
130 Reproductive females were identified as those returning to a nest hole with pollen on their  
131 hind legs. They were captured by net, and flash-frozen immediately upon return to the  
132 laboratory.

133

### 134 *Experiment 2 – social and endocrine effects on reproductive physiology*

135 Newly emerged females were collected as in Experiment 1. Each bee was randomly  
136 assigned to a treatment group: sham control, solvent control, or JH. For JH treatments, JH-  
137 III (product E589400, Toronto Research Chemicals, Inc., Toronto, Ontario, Canada) was  
138 dissolved in dimethylformamide (DMF) at a concentration of 50 µg per µl. Bees in the  
139 solvent control group received 1 µl of DMF applied to the thorax with a pipette tip. Bees in  
140 the JH group received 50 µg JH in 1 µl of DMF applied to the thorax with a pipette tip. Bees  
141 in the sham group were touched lightly on the thorax with a clean pipette tip. Hormone  
142 treatments were repeated when bees were 5 d old. Bees in each treatment group were  
143 randomly assigned to be caged alone or with an older, reproductive female, defined as  
144 above. All bees were paint-marked on the dorsal abdomen with a uniquely colored  
145 Decocolor® paint pen (Uchida of America Co, Torrance, CA). All bees were reared in cages,  
146 and received 35% sugar water mixed with pollen and fresh alfalfa flowers for 10 d, as  
147 described for Experiment 1.

148

149 Upon collection, all bees from both experiments were stored in liquid nitrogen until return to  
150 Utah State University, where they were transferred to a -80 °C freezer.

151

### 152 *Dissections*

153 Dissections followed previously reported methods (Kapheim and Johnson, 2017). Briefly,  
154 bees were dissected under a Leica M80 stereomicroscope fitted with an IC80HD camera  
155 (Leica Microsystems, Buffalo Grove, IL, USA). We measured Dufour's gland and terminal  
156 oocyte lengths from images, using software in the Leica Application Suite (v. 4.5). The  
157 observer was blind to the treatment group of each bee during dissections, and both authors

158 concurred on measurements. Mating status was determined by examination of the  
159 spermatheca under a compound microscope. We excluded newly emerged females with  
160 sperm and reproductive females without sperm from further analyses.

161

### 162 *Stages of ovary maturation*

163 Images were further analyzed to classify ovaries into stages of oocyte maturation. Like most  
164 halictid bees, alkali bees have three ovarioles in each of two ovaries. The following  
165 categories were modified from Duchateau and Velthuis (1989) and Oliveira et al. (2017).  
166 Stage I – the oocyte and associated trophocytes occupying a single egg chamber can be  
167 distinguished from one another, but the oocyte is much smaller than the trophocytes and is  
168 spherical in shape. Stage II – the oocyte is smaller than the trophocytes, and is cylindrical  
169 in shape rather than round. Stage III – the trophocytes and oocyte are similar in size, the  
170 oocyte occupying 45-55% of the length of the egg chamber. The oocyte is elongated. The  
171 trophocytes appears less opaque, and the oocyte appears more solid and full. It is during  
172 this stage in which vitellogenesis is initiated. Stage IV – the oocyte is much longer than the  
173 trophocytes, and occupies more than 55% of the total egg chamber. The trophocytes  
174 appear translucent and small in the anterior portion of the egg chamber. Stage IVr  
175 (reabsorbing) – the oocyte has all the characteristics of stage IV, but is misshapen and  
176 yellow in color, indicating reabsorption. Stage V – the oocyte is large, robust, and opaque  
177 with no associated trophocytes. Vitellogenesis is complete at this stage. Stage Vr  
178 (reabsorbing) – oocyte has no trophocytes present, but has the characteristics of being  
179 reabsorbed. When possible, we measured the length of the maximum terminal oocyte and  
180 its associated trophocytes of both resorbing (if present) and viable oocytes, and used these  
181 measurements to classify stage of ovary maturation. We identified the maximum terminal  
182 oocyte and maximum stage of oocyte maturation as the longer/more mature from the two  
183 ovaries. We used these maxima for statistical analyses.

184

### 185 *Pollen quantification*

186 To determine whether our diet treatments were effective, we quantified the amount of  
187 pollen consumed by lab-reared females receiving pollen, relative to reproductive females, by  
188 estimating the number of pollen grains in the hindgut. We followed previously described  
189 methods (Cane et al., 2016) to estimate pollen grains in 6 hindguts from each group.  
190 Individual hindguts were placed in 0.5 ml microcentrifuge tubes with 50  $\mu$ l of 70% ethanol  
191 and torn apart with forceps. After guts were shredded, the mix was vortexed for 5 sec,  
192 using Vortex Genie 2 on highest setting of 10. The shredded gut was then removed using

193 forceps, dabbing tissue on sides of the tube to remove excess ethanol and pollen. Each  
194 sample was vortexed on the highest setting for 10 seconds immediately prior to loading 10  
195  $\mu$ l of the solution into one chamber of a hemocytometer for pollen counting. Pollen grains  
196 were counted across the entire chamber under a compound microscope at 20X  
197 magnification. Three different 10  $\mu$ l aliquots were counted for each sample, using the entire  
198 chamber each time. For each sample, the average of these three counts was divided by  
199 0.0009 ml, the volume of each hemocytometer chamber, and then multiplied by the volume  
200 of ethanol used per sample (0.05 ml).

201

### 202 *Statistical analyses*

203 All statistical analyses were performed in R version 3.2.5 (R Core Team, 2016). Visual  
204 inspection of a qq-plot (R package "car", (Fox and Weisberg, 2011)) and an Anderson-  
205 Darling normality test (R package "nortest", (Gross and Ligges, 2015)) revealed significant  
206 departures from normality in the distribution of maximum terminal oocyte and Dufour's  
207 gland lengths for Experiment 1, but not Experiment 2. We therefore applied a Box-Cox  
208 transformation to the data for Experiment 1 before running the final model (Venables and  
209 Ripley, 2002). For both Experiment 1 and 2, we modeled the maximum viable terminal  
210 oocyte and Dufour's gland lengths with separate linear mixed effects regressions that  
211 initially included intertegular width and treatment (coded as factors: diet for Experiment 1,  
212 JH\*social for Experiment 2) as fixed effects, with bee bed of origin as a random effect  
213 (Bates et al., 2015). In each case, the variance and standard deviation for the intercept of  
214 bee bed was zero, so a linear model without random effects was used for subsequent  
215 analyses. Intertegular width was removed from the final models in the cases where it was  
216 non-significant ( $p > 0.05$ ) – all except Dufour's gland length in Experiment 2. We used  
217 Tukey post-hoc tests to investigate significant differences between treatment groups  
218 (Hothorn et al., 2008).

219

220 For Experiment 2, we repeated the analyses after removing cases where the older,  
221 reproductive partner had a smaller intertegular width, maximum terminal oocyte, or  
222 Dufour's gland than the newly emerged cage-mate to determine whether relative size or  
223 reproductive development influenced the outcome of the social treatment.

224

225 We compared stages of oocyte maturation across treatment groups in Experiment 1 with  
226 ordinal logistic regression (R package "ordinal", (Christensen, 2015)). However, this model  
227 was not appropriate for the data in Experiment 2, due to low representation of some values.

228 We compared the proportion of oocyte maturation stage among JH treatment groups in  
229 Experiment 2 using a chi-square test (R package “stats”, (R Core Team, 2016)). We also  
230 used a chi-square test to compare the proportion of samples with and without resorbed  
231 oocytes across groups in Experiments 1 and 2.

232

233 Final estimates of pollen counts in the hindgut were compared between groups  
234 (reproductive, nesting females, sugar & pollen mix, sugar, pollen, & alfalfa flowers) with a  
235 linear model function (lm), after applying a Box-Cox transformation of the data (Venables  
236 and Ripley, 2002).

237

## 238 **Results**

### 239 *Patterns of ovary maturation*

240 We used the reproductive and newly emerged females to describe patterns of oocyte  
241 maturation in alkali bees. Newly emerged bees activate their oocytes rapidly, even without  
242 mating. The modal stage of maturation for newly emerged females was one viable stage I  
243 oocyte, with a viable stage I or II oocyte in the other ovary. However, three newly emerged  
244 females had viable stage IV or V oocytes in both ovaries. It is possible that these females  
245 had spent a day or more in their nests upon eclosion, and were therefore slightly older than  
246 the others. Newly emerged females did not show any evidence of resorbing oocytes.

247

248 The modal stage of maturation for reproductive females was one viable stage IV oocyte and  
249 one viable stage IV or V oocyte in the other ovary. The maximum viable terminal oocytes in  
250 both ovaries were vitellogenic (stage III, IV, or V) for all reproductive females, except one  
251 with a pre-vitellogenic (stage II) oocyte in one ovary. Most (70%) reproductive females had  
252 at least one resorbing oocyte, and 35% had a resorbing oocyte in both ovaries. Resorbing  
253 oocytes were all in either category IVr or Vr, with 58% in stage Vr. The maximum viable  
254 terminal oocytes in ovaries with a resorbing oocyte were in stage III or IV, indicating that  
255 oocyte maturation is sequential across ovarioles within an ovary.

256

### 257 *Experiment 1 – nutrition effects on reproductive physiology*

258 Mortality was not significantly different among lab-reared females on different diet  
259 treatments (mortality: sugar – 40%, sugar & pollen – 32%, sugar, pollen, & flowers – 46%;  
260  $\chi^2 = 1.29$ ,  $p = 0.52$ ,  $n = 92$ ). There were significant differences in both maximum viable  
261 terminal oocyte and Dufour’s gland length among treatment groups (oocytes:  $F_{4,89} = 30.68$ ,  
262  $r^2 = 0.58$ ,  $p < 4.79 \times 10^{-16}$ , Table S1; Dufour’s:  $F_{4,101} = 45.80$ ,  $r^2 = 0.64$ ,  $p < 2.20 \times 10^{-16}$ ,



263 Table S2). Among these groups, lab-reared, 10 d old females had significantly longer viable  
264 maximum terminal oocytes and Dufour's glands than newly emerged females (Fig. 1).  
265 However, actively nesting reproductive females had significantly more developed  
266 reproductive anatomy than either newly emerged or lab-reared females (Fig. 1). We did not  
267 observe significant differences in maximum viable terminal oocyte or Dufour's gland length  
268 among females reared in the lab for 10 d on different diets (Fig. 1).

269  
270 The maximum viable terminal oocytes of newly emerged females were at significantly lower  
271 stages of development than those of lab-reared 10 d old females or reproductive females,  
272 but there were no significant differences between females in the latter groups, all but one of  
273 whom had vitellogenic oocytes (stage III or higher) (ordinal logistic regression:  $Z = -4.61$ ,  $p$   
274  $= 3.99 \times 10^{-6}$ ; Fig. 2). Three lab-reared 10 d old females that received a sugar and pollen  
275 diet developed viable mature oocytes (stage V). Approximately half of the lab-reared  
276 females had at least one resorbing oocyte (sugar only – 50%, sugar & pollen – 50%, sugar,  
277 pollen, & flowers – 57%), and all except one (stage Vr) were in stage IVr. The proportion of  
278 females with resorbing oocytes among lab-reared females was not significantly different  
279 from that of reproductive females ( $\chi^2 = 2.10$ ,  $p = 0.55$ ,  $n = 70$  bees). However, most  
280 (58%) of the resorbing oocytes in reproductive females were in a more advanced stage  
281 (Vr).

282  
283 The estimated number of pollen grains detected in the hindguts was not significantly  
284 different among reproductive females and the two groups of lab-reared females that  
285 received pollen in their diet ( $F_{2,15} = 3.32$ ,  $r^2 = 0.31$ ,  $p = 0.06$ , Fig. 3).

286

### 287 *Experiment 2 – social and endocrine effects on reproductive physiology*

288 Mortality was not significantly different among treatment groups in Experiment 2 (mortality:  
289 sham/solitary – 19%, sham/social – 19%, DMF/solitary – 20%, DMF/social – 47%,  
290 JH/solitary – 35%, JH/social – 44%;  $\chi^2 = 7.04$ ,  $p = 0.22$ ,  $n = 101$ ). There were significant  
291 differences in maximum viable terminal oocyte and Dufour's gland length among treatment  
292 groups (oocytes:  $F_{5,41} = 6.68$ ,  $r^2 = 0.45$ ,  $p = 1.23 \times 10^{-4}$ , Table S3; Dufour's:  $F_{6,57} = 8.77$ ,  $r^2$   
293  $= 0.48$ ,  $p = 8.97 \times 10^{-7}$ , Table S4). Females treated with JH had significantly longer viable  
294 terminal oocytes and Dufour's glands than females in control groups, but variation in the  
295 social environment did not have a significant effect on these measures of reproductive  
296 physiology (Fig. 4).

297

298 Reproductive females and newly emerged females paired in the social treatments were  
299 similar in size to one another (mean ratio of intertegular width =  $1.03 \pm 0.11$  s.d.). On  
300 average, the reproductive females had longer viable oocytes and Dufour's glands than their  
301 newly emerged cage-mates (mean ratio of maximum terminal oocyte length =  $1.72 \pm 0.62$ ,  
302 mean ratio of Dufour's glands =  $1.13 \pm 0.17$ ). However, there were 12 cases for which the  
303 reproductive female was smaller and/or had smaller ovaries or Dufour's glands than their  
304 newly emerged female cage-mates. Elimination of these 12 cases from the dataset did not  
305 change the results (Table S5-S6).

306

307 There were significant differences in stage of oocyte maturation among JH treatment groups  
308 ( $\chi^2 = 23.20$ ,  $p = 7.31 \times 10^{-4}$ ,  $n = 40$  bees). Only females treated with JH had viable mature  
309 oocytes (stage V), and sham treated bees were the only group with pre-vitellogenic (stage  
310 II) oocytes (Fig. 5). Most (78%) of the JH-treated females had at least one resorbing  
311 oocyte, while 55-58% of the females in the control treatments had a resorbing oocytes.  
312 However, this difference was not statistically significant ( $\chi^2 = 2.56$ ,  $p = 0.28$ ,  $n = 64$ ).  
313 Resorbed oocytes were in stage IVr and Vr in each group.

314

## 315 Discussion

316 Variation in reproductive physiology is a hallmark of the social insect societies, in which just  
317 one or a few individuals out of thousands within a colony are reproductively active, despite  
318 shared genetic influences. Investigating the factors that contribute to reproductive variation  
319 in solitary relatives of social insects can provide clues as to how reproductive castes evolve  
320 (Kapheim, 2017). Our results demonstrate that solitary alkali bees do not require dietary  
321 protein during the initial stages of reproductive maturation, but that JH enhances this  
322 process. We also find that, unlike for social bees, interactions between conspecifics do not  
323 influence reproductive physiology. This provides important information about the  
324 physiological foundation from which reproductive castes emerged.

325

326 Access to dietary protein did not limit reproductive activation among newly emerged alkali  
327 bees, but it was rarely sufficient for reproductive maturation. Most of the lab-reared females  
328 in our study did not develop mature (stage V or Vr) oocytes or Dufour's glands during the  
329 10 d study period, despite having similar amounts of pollen in their hindguts as actively  
330 nesting, reproductive females, indicating they had consumed ecologically relevant amounts  
331 of pollen during the experiment. Alkali bees commonly begin laying eggs within a few days  
332 of eclosion, and some of the newly emerged bees had mature oocytes, indicating that our

333 study period provided ample time for reproductive maturation (Bohart and Cross, 1955). It  
334 is possible that the completion of reproductive maturation is hastened by ecological cues,  
335 such as nesting substrate, or access to mates. Seminal fluid is known to trigger oogenesis in  
336 several insect species (Avila et al., 2011), and mating limitation is known to influence  
337 reproductive activity in other halictid bees (Yanega, 1989; Yanega, 1992). However, lab-  
338 reared females of another halictid bee, *Megalopta genalis*, reached reproductive maturity  
339 when reared, unmated, in the lab for 10 days (Kapheim et al., 2012). If mating is a  
340 reproductive limitation in alkali bees, it can apparently be overridden by JH treatments, as  
341 JH treated females in our study were more likely to reach reproductive maturity, even in the  
342 absence of mating or ecological cues. Regardless of the role of dietary protein in the  
343 initiation of reproductive activation, the fact that alkali bees and other closely related  
344 halictid bees consume pollen on a daily basis suggests that protein is likely necessary for  
345 sustained reproductive activity throughout the breeding season (Cane et al., 2016;  
346 Wuellner, 1999).

347  
348 Our results are in contrast to results of similar studies of solitary bees in the family  
349 Megachilidae, *Osmia californica* and *Megachile rotundata*, which showed access to dietary  
350 protein is essential for reproductive maturation among newly emerged females (Cane,  
351 2016; Richards, 1994). Unlike alkali bees, *Osmia* overwinter as adults, begin oogenesis prior  
352 to eclosion, and thus eclose with depleted protein stores (Wasielewski et al., 2011). Protein  
353 stores have not been measured in newly emerged alkali bees, but remaining reproductively  
354 quiescent until eclosion is likely to be less energetically expensive and may be associated  
355 with increased availability of nutrient stores for post-eclosion maturation (Hahn and  
356 Denlinger, 2007). Alkali bees may therefore be better poised to initiate oogenesis without a  
357 dietary protein source. Conversely, pollen is necessary to stimulate vitellogenesis in *M.*  
358 *rotundata*, which also remains reproductively quiescent until eclosion. The apparent  
359 difference in nutritional requirements for oogenesis among megachilid and halictid bees  
360 indicates that the physiological basis for reproductive activity is highly variable among  
361 solitary bees. This suggests that assumptions about reproductive physiology among the  
362 ancestors of social bees should be made with caution. Additional research on solitary bees  
363 from additional families in which eusociality has evolved (e.g., Apidae) are necessary to fully  
364 understand variation in nutritional requirements for reproduction.

365  
366 Our results suggest that JH is a limiting factor in reproductive maturation among alkali bees.  
367 Females treated with JH were significantly more likely to have developed viable mature

368 (stage V) oocytes and Dufour's glands, though other groups had mature resorbing (stage  
369 Vr) oocytes. This is consistent with earlier results (Kapheim and Johnson, 2017), and  
370 provides evidence of a conserved gonadotropic role for JH in alkali bees. In most insects,  
371 including bumble bees, JH stimulates the synthesis of vitellogenin, an egg-yolk precursor  
372 protein necessary for oocyte maturation (Amsalem et al., 2015; Badisco et al., 2013). This  
373 suggests the gonadotropic response to JH may depend on a dietary source of protein. All of  
374 the females receiving JH treatments in our study also received dietary protein from pollen,  
375 and thus had the nutritional resources necessary to complete vitellogenesis. Future studies  
376 are needed to determine how nutrition and JH pathways interact in alkali bee oogenesis.

377

378 The path by which JH stimulates Dufour's gland maturation is less clear, as Dufour's gland  
379 evolved in the ancestor of Hymenoptera, and secretes chemicals with a wide range of  
380 functions within this group (Mitra, 2013). Dufour's gland is likely derived from the colleterial  
381 accessory gland in other insects (Mitra, 2013), and reproductive maturity of this gland is  
382 induced by JH in cockroaches (*Byrsotria fumigata*, *Periplaneta americana*) (Bell and Barth,  
383 1970; Willis and Brunet, 1966). Moreover, JH influences the chemical composition of  
384 Dufour's gland secretions in bumble bee (*B. terrestris*) workers (Shpigler et al., 2014). This,  
385 along with our results, suggests that endocrine regulation of Dufour's gland is deeply  
386 conserved among insects. Additional research is needed to determine the molecular  
387 mechanisms by which JH affects Dufour's gland function.

388

389 Unlike for social bees and some solitary bees, variation in the social environment does not  
390 influence reproductive physiology among solitary alkali bees. Most of the 20,000 species of  
391 bees are solitary, mass-provisioning, and annual (Michener, 2007). This means that after  
392 mating, females build a nest, provision each brood cell with pollen and nectar, lay an egg on  
393 top of those provisions, seal the cell, and die before any of her offspring complete  
394 development. For many of these species, a single mating event is the only interaction they  
395 have with conspecifics in their entire lives. Conversely, highly eusocial insects have evolved  
396 sophisticated forms of social communication. Within colonies of honey bees, bumble bees,  
397 and sweat bees, behavior and reproductive physiology is dynamically regulated by the  
398 behavior and/or pheromones of nestmates (Alaux et al., 2009; Amsalem and Hefetz, 2010;  
399 Arneson and Wcislo, 2003; Grozinger et al., 2003; Huang et al., 1998; Kapheim et al.,  
400 2016; Le Conte et al., 2001; Li-Byarlay et al., 2014; Padilla et al., 2016; Smith et al.,  
401 2009). Research with a facultatively eusocial halictid bee, *M. genalis*, suggests that  
402 aggression from older, reproductive females can limit reproductive development via JH-

403 suppression in newly emerged females (Kapheim et al., 2016; Smith et al., 2009; Smith et  
404 al., 2013). However, the degree to which solitary bees respond to social cues varies among  
405 species. For example, experimental co-housing of otherwise solitary *Ceratina* bees (Family  
406 Apidae) results in division of labor and reproductive suppression in species that occasionally  
407 share nests in nature (Sakagami and Maeta, 1977; Sakagami and Maeta, 1984; Sakagami  
408 and Maeta, 1989; Sakagami and Maeta, 1995), but apparently not in species that never  
409 share nests, like alkali bees. Although we did not directly measure behavioral interactions  
410 among pairs as part of our study, we routinely observed aggressive exchanges among pairs  
411 of females in cages. Our results thus suggest that sensitivity to cues from the social  
412 environment observed in social halictid bees are not conserved in their solitary relatives.  
413 Alkali bees nest in extremely dense aggregations, with up to 713 nests per square meter in  
414 study area (Cane, 2008). At high density, these ground-nesting females are likely to  
415 encounter each other regularly as they dig tunnels and build cells, and there is thus likely to  
416 be strong selection against physiological sensitivity to social interactions in these  
417 populations. Similar studies with additional solitary bees are necessary to identify the  
418 circumstances under which sensitivity to the social environment influences reproductive  
419 physiology.

420

## 421 **Conclusions**

422 This study is the first experimental investigation of dietary, endocrine, and social effects on  
423 reproductive maturation in a solitary bee closely related to lineages in which sociality  
424 evolved, but which is highly divergent (>100 my) from the more commonly studied eusocial  
425 honey bees and bumble bees (Cardinal and Danforth, 2013). Our results reveal that the  
426 factors contributing to the initiation of reproductive activation and completion of  
427 reproductive maturity may be different. Specifically, dietary protein was not essential for  
428 the initiation of reproductive activation, but was rarely sufficient for reproductive  
429 maturation. JH, however, may be a limiting factor in maturation of both oocytes and  
430 Dufour's gland. This provides important insight into how sensitivity to these cues evolved  
431 with the origin of reproductive castes in social insects. For example, the effects of JH on  
432 ovary and Dufour's gland maturation are apparently conserved between solitary alkali bees  
433 and bumble bee workers. However, these JH effects are responsive to social status in  
434 bumble bees, but not alkali bees (Amsalem et al., 2014; Shpigler et al., 2014). This  
435 suggests that different components of the endocrine networks influencing reproductive  
436 physiology were independently modified during social evolution. Also, nutrition and cues  
437 from the social environment are some of the most important factors in reproductive

438 suppression of workers among social bees (Amsalem et al., 2013; Kapheim et al., 2016;  
439 Lawson et al., 2016; Padilla et al., 2016), but these factors did not have a significant  
440 influence on variation in reproductive activation in solitary alkali bees. This suggests that  
441 changes in how nutrient-sensing and environment-sensing pathways regulate reproductive  
442 physiology were especially important in the evolutionary origins of reproductive castes.  
443 Further comparisons of the molecular networks underlying the physiological response to  
444 nutritional, endocrine, and social cues across species are likely to provide key insight into  
445 how reproductive division of labor evolves.

446

#### 447 **Acknowledgements**

448 Thanks to A. Tripodi for help with imaging spermathecae, E. Klinger for help with pollen  
449 counting, and J. Cane for helpful discussion. Thanks to A. Tripodi, D. Cox-Foster, and two  
450 anonymous reviewers for helpful comments on a previous version of this manuscript. We  
451 are grateful to John Dodd and Forage Genetics International for providing lab space and  
452 logistical support in Touchet, WA. We thank Mike Ingham, Mark Wagoner, and Mike Buckley  
453 for access to their bee beds and bees. M. Jolley and F. Dowsett provided valuable assistance  
454 in the field.

455

#### 456 **Competing interest**

457 The authors declare no competing or financial interests.

458

#### 459 **Author contributions**

460 KMK designed the study. KMK and MMJ conducted the experiments and analyses. KMK  
461 drafted the initial manuscript. KMK and MMJ revised the manuscript and approved the final  
462 version.

463

#### 464 **Funding**

465 This work was supported by the USDA-ARS Alfalfa Pollinator Research Initiative and the  
466 Utah Agricultural Experiment Station [project 1297].

467

#### 468 **References**

469 **Alaux, C., Le Conte, Y., Adams, H. A., Rodriguez-Zas, S., Grozinger, C. M., Sinha, S.**  
470 **and Robinson, G. E. (2009).** Regulation of brain gene expression in honey bees by brood  
471 pheromone. *Genes, Brain and Behavior* **8**, 309-319.

472 **Amsalem, E., Grozinger, C. M., Padilla, M. and Hefetz, A. (2015).** Chapter Two - The

- 473 physiological and genomic bases of bumble bee social behaviour. In *Advances in Insect*  
474 *Physiology*, vol. Volume 48 eds. Z. Amro and F. K. Clement), pp. 37-93: Academic Press.
- 475 **Amsalem, E. and Hefetz, A.** (2010). The appeasement effect of sterility signaling in  
476 dominance contests among *Bombus terrestris* workers. *Behavioral Ecology and Sociobiology*  
477 **64**, 1685-1694.
- 478 **Amsalem, E., Shamia, D. and Hefetz, A.** (2013). Aggression or ovarian development  
479 as determinants of reproductive dominance in *Bombus terrestris*: interpretation using a  
480 simulation model. *Insectes Sociaux* **60**, 213-222.
- 481 **Amsalem, E., Teal, P., Grozinger, C. M. and Hefetz, A.** (2014). Precocene-I inhibits  
482 juvenile hormone biosynthesis, ovarian activation, aggression and alters sterility signal  
483 production in bumble bee (*Bombus terrestris*) workers. *J Exp Biol* **217**, 3178-85.
- 484 **Arneson, L. and Wcislo, W. T.** (2003). Dominant-subordinate relationships in a  
485 facultatively social, nocturnal bee, *Megalopta genalis* (Hymenoptera: Halictidae). *Journal of*  
486 *the Kansas Entomological Society* **76**, 183-193.
- 487 **Avila, F. W., Sirot, L. K., LaFlamme, B. A., Rubinstein, C. D. and Wolfner, M. F.**  
488 (2011). Insect seminal fluid proteins: identification and function. *Annu Rev Entomol* **56**, 21-  
489 40.
- 490 **Badisco, L., Van Wielendaele, P. and Vanden Broeck, J.** (2013). Eat to reproduce: a  
491 key role for the insulin signaling pathway in adult insects. *Front Physiol* **4**, 202.
- 492 **Bates, D., Maechler, M., Bolker, B. and Walker, S.** (2015). Fitting linear mixed-  
493 effects models using lme4. *Journal of Statistical Software* **67**, 1-48.
- 494 **Batra, S. W. T.** (1970). Behavior of alkali bee, *Nomia-melanderi*, within nest  
495 (Hymenoptera-Halictidae). *Annals of the Entomological Society of America* **63**, 400-406.
- 496 **Batra, S. W. T. and Bohart, G. E.** (1969). Alkali bees: response of adults to  
497 pathogenic fungi in brood cells. *Science* **165**, 607.
- 498 **Bell, W. J. and Barth, R. H.** (1970). Quantitative effects of juvenile hormone on  
499 reproduction in the cockroach *Byrsotria fumigata*. *Journal of Insect Physiology* **16**, 2303-  
500 2313.
- 501 **Bohart, G. E. and Cross, E. A.** (1955). Time relationships in the nest construction and  
502 life cycle of the alkali bee. *Ann. Ent. Soc. Amer.* **48**, 403-406.
- 503 **Brady, S. G., Sipes, S., Pearson, A. and Danforth, B. N.** (2006). Recent and  
504 simultaneous origins of eusociality in halictid bees. *Proceedings of Royal Society London B -*  
505 *Biological Sciences* **273**, 1643-9.
- 506 **Cane, J. H.** (1981). Dufour's gland secretion in the cell linings of bees (Hymenoptera:  
507 Apoidea). *Journal of Chemical Ecology* **7**, 403-10.

- 508           **Cane, J. H.** (2008). A native ground-nesting bee (*Nomia melanderi*) sustainably  
509 managed to pollinate alfalfa across an intensively agricultural landscape. *Apidologie* **39**,  
510 315-323.
- 511           **Cane, J. H.** (2016). Adult pollen diet essential for egg maturation by a solitary *Osmia*  
512 bee. *Journal of Insect Physiology* **95**, 105-109.
- 513           **Cane, J. H., Dobson, H. E. M. and Boyer, B.** (2016). Timing and size of daily pollen  
514 meals eaten by adult females of a solitary bee (*Nomia melanderi*) (Apiformes: Halictidae).  
515 *Apidologie* **48**, 17-30.
- 516           **Cardinal, S. and Danforth, B. N.** (2013). Bees diversified in the age of eudicots. *Proc*  
517 *Biol Sci* **280**, 20122686.
- 518           **Christensen, R. H. B.** (2015). ordinal - Regression Models for Ordinal Data.
- 519           **Danforth, B. N., Eardley, C., Packer, L., Walker, K., Pauly, A. and**  
520 **Randrianambinintsoa, F. J.** (2008). Phylogeny of Halictidae with an emphasis on endemic  
521 African Halictinae. *Apidologie* **39**, 86-101.
- 522           **Duchateau, M. J. and Velthuis, H. H. W.** (1989). Ovarian development and egg laying  
523 in workers of *Bombus terrestris*. *Entomologia Experimentalis et Applicata* **51**, 199-213.
- 524           **Fox, J. and Weisberg, S.** (2011). An R companion to applied regression. Thousand  
525 Oaks, CA: Sage.
- 526           **Gibbs, J., Brady, S. G., Kanda, K. and Danforth, B. N.** (2012). Phylogeny of halictine  
527 bees supports a shared origin of eusociality for *Halictus* and *Lasioglossum* (Apoidea:  
528 Anthophila: Halictidae). *Molecular Phylogenetics and Evolution* **65**, 926-939.
- 529           **Giray, T., Giovanetti, M. and West-Eberhard, M. J.** (2005). Juvenile hormone,  
530 reproduction, and worker behavior in the neotropical social wasp *Polistes canadensis*.  
531 *Proceedings of the National Academy of Sciences of the United States of America* **102**,  
532 3330-3335.
- 533           **Gross, J. and Ligges, U.** (2015). nortest: Tests for Normality. In *R package version*  
534 *1.0-4*.
- 535           **Grozinger, C. M., Sharabash, N. M., Whitfield, C. W. and Robinson, G. E.** (2003).  
536 Pheromone-mediated gene expression in the honey bee brain. *Proceedings of the National*  
537 *Academy of Sciences of the United States of America* **100**, 14519-14525.
- 538           **Hahn, D. A. and Denlinger, D. L.** (2007). Meeting the energetic demands of insect  
539 diapause: nutrient storage and utilization. *Journal of Insect Physiology* **53**, 760-773.
- 540           **Hothorn, T., Bretz, F. and Westfall, P.** (2008). Simultaneous inference in general  
541 parametric models. *Biometrical J* **50**, 346 - 363.
- 542           **Huang, Z. Y., Plettner, E. and Robinson, G. E.** (1998). Effects of social environment



543 and worker mandibular glands on endocrine-mediated behavioral development in honey  
544 bees. *Journal of Comparative Physiology A: Neuroethology, Sensory, Neural, and Behavioral*  
545 *Physiology* **183**, 143-152.

546 **Kapheim, K. M.** (2017). Nutritional, endocrine, and social influences on reproductive  
547 physiology at the origins of social behavior. *Current Opinion in Insect Science* **22**, 62-70.

548 **Kapheim, K. M., Chan, T. Y., Smith, A. R., Wcislo, W. T. and Nonacs, P.** (2016).  
549 Ontogeny of division of labor in a facultatively eusocial sweat bee *Megalopta genalis*.  
550 *Insectes Sociaux* **63**, 185-191.

551 **Kapheim, K. M. and Johnson, M. M.** (2017). Support for the reproductive ground plan  
552 hypothesis in a solitary bee: links between sucrose response and reproductive status. *Proc*  
553 *Biol Sci* **284**, 20162406.

554 **Kapheim, K. M., Smith, A. R., Ihle, K. E., Amdam, G. V., Nonacs, P. and Wcislo, W.**  
555 **T.** (2012). Physiological variation as a mechanism for developmental caste-biasing in a  
556 facultatively eusocial sweat bee. *Proceedings of the Royal Society B: Biological Sciences*  
557 **279**, 1437-1446.

558 **Lawson, S. P., Ciaccio, K. N. and Rehan, S. M.** (2016). Maternal manipulation of  
559 pollen provisions affects worker production in a small carpenter bee. *Behavioral Ecology and*  
560 *Sociobiology* **70**, 1891-1900.

561 **Le Conte, Y., Mohammedi, A. and Robinson, G. E.** (2001). Primer effects of a brood  
562 pheromone on honeybee behavioural development. *Proceedings of the Royal Society of*  
563 *London. Series B: Biological Sciences* **268**, 163-168.

564 **Li-Byarlay, H., Rittschof, C. C., Massey, J. H., Pittendrigh, B. R. and Robinson, G. E.**  
565 (2014). Socially responsive effects of brain oxidative metabolism on aggression.  
566 *Proceedings of the National Academy of Sciences*.

567 **Michener, C. D.** (1974). The social behavior of the bees. Cambridge, MA: Harvard  
568 University Press.

569 **Michener, C. D.** (2007). Bees of the world. Baltimore, MD: The Johns Hopkins  
570 University Press.

571 **Mitra, A.** (2013). Function of the Dufour's gland in solitary and social Hymenoptera.  
572 *Journal of Hymenoptera Research* **35**, 33-58.

573 **Oliveira, R. C., Vollet-Neto, A., Akemi Oi, C., van Zweden, J. S., Nascimento, F.,**  
574 **Sullivan Brent, C. and Wenseleers, T.** (2017). Hormonal pleiotropy helps maintain queen  
575 signal honesty in a highly eusocial wasp. *Sci Rep* **7**, 1654.

576 **Padilla, M., Amsalem, E., Altman, N., Hefetz, A. and Grozinger, C. M.** (2016).  
577 Chemical communication is not sufficient to explain reproductive inhibition in the bumblebee

- 578 *Bombus impatiens*. *R Soc Open Sci* **3**, 160576.
- 579 **R Core Team.** (2016). R: A language and environment for statistical computing.  
580 Vienna, Austria: R Foundation for Statistical Computing.
- 581 **Richards, K. W.** (1994). Ovarian development in the alfalfa leafcutter bee, *Megachile*  
582 *rotunda*. *Journal of Apicultural Research* **33**, 199-203.
- 583 **Roulston, T. H. and Cane, J. H.** (2000). Pollen nutritional content and digestibility for  
584 animals. *Plant Systematics and Evolution* **222**, 187-209.
- 585 **Sakagami, S. F. and Maeta, Y.** (1977). Some presumably pre-social habits of  
586 Japanese *Ceratina* bees, with notes on various social types in Hymenoptera. *Insectes*  
587 *Sociaux* **24**, 319-343.
- 588 **Sakagami, S. F. and Maeta, Y.** (1984). Multifemale nests and rudimentary castes in  
589 the normally solitary bee *Ceratina-japonica* (Hymenoptera, Xylocopinae). *Journal of the*  
590 *Kansas Entomological Society* **57**, 639-656.
- 591 **Sakagami, S. F. and Maeta, Y.** (1989). Compatibility and incompatibility of solitary  
592 life with eusociality in two normally solitary bees *Ceratina japonica* and *Ceratina okinawana*  
593 (Hymenoptera, Apoidea), with notes on the incipient phase of eusociality. *Jap J Entomol* **57**,  
594 417-739.
- 595 **Sakagami, S. F. and Maeta, Y.** (1995). Task allocation in artificially induced colonies  
596 of a basically solitary bee *Ceratina (Ceratinidia) okinawana*, with a comparison of sociality  
597 between *Ceratina* and *Xylocopa* (Hymenoptera, Anthophoridae, Xylocopinae). *Jap J Ecol* **63**,  
598 115-150.
- 599 **Schwarz, M. P., Richards, M. H. and Danforth, B. N.** (2007). Changing paradigms in  
600 insect social evolution: insights from halictine and allodapine bees. *Annual Review of*  
601 *Entomology* **52**, 127-50.
- 602 **Shpigler, H., Amsalem, E., Huang, Z. Y., Cohen, M., Siegel, A. J., Hefetz, A. and**  
603 **Bloch, G.** (2014). Gonadotropic and physiological functions of juvenile hormone in  
604 bumblebee (*Bombus terrestris*) workers. *PLoS One* **9**, e100650.
- 605 **Smith, A. R., Kapheim, K. M., O'Donnell, S. and Wcislo, W. T.** (2009). Social  
606 competition but not subfertility leads to a division of labour in the facultatively social sweat  
607 bee *Megalopta genalis* (Hymenoptera: Halictidae). *Animal Behaviour* **78**, 1043-1050.
- 608 **Smith, A. R., Kapheim, K. M., Perez-Ortega, B., Brent, C. S. and Wcislo, W. T.**  
609 (2013). Juvenile hormone levels reflect social opportunities in the facultatively eusocial  
610 sweat bee *Megalopta genalis* (Hymenoptera: Halictidae). *Horm Behav* **63**, 1-4.
- 611 **Venables, W. N. and Ripley, B. D.** (2002). Modern applied statistics with S. New  
612 York: Springer.

613 **Wasielewski, O., Giejdasz, K., Wojciechowicz, T. and Skrzypski, M.** (2011). Ovary  
614 growth and protein levels in ovary and fat body during adult-wintering period in the red  
615 mason bee, *Osmia rufa*. *Apidologie* **42**, 749-758.

616 **Wcislo, W. T. and Engel, M. S.** (1996). Social behavior and nest architecture of  
617 nomiine bees (Hymenoptera: Halictidae; Nomiinae). *Journal of the Kansas Entomological*  
618 *Society* **69**, 158-167.

619 **Willis, J. H. and Brunet, P. C. J.** (1966). The hormonal control of colleterial gland  
620 secretion. *Journal of Experimental Biology* **44**, 363-378.

621 **Winston, M. L.** (1987). The biology of the honey bee. Cambridge, MA: Harvard  
622 University Press.

623 **Wuellner, C. T.** (1999). Alternative reproductive strategies of a gregarious ground-  
624 nesting bee, *Dieunomia triangulifera* (Hymenoptera: Halictidae). *Journal of Insect Behavior*  
625 **12**, 845-863.

626 **Yanega, D.** (1989). Caste determination and differential diapause within the first  
627 brood of *Halictus rubicundus* in New York (Hymenoptera, Halictidae). *Behav Ecol Sociobiol*  
628 **24**, 97 - 107.

629 **Yanega, D.** (1992). Does mating determine caste in sweat bees - (Hymenoptera,  
630 Halictidae). *Journal of the Kansas Entomological Society* **65**, 231-237.

631

## 632 **Figure Legends**

633

634 **Figure 1. Effects of diet on reproductive maturation in alkali bees.** (A) Maximum  
635 viable terminal oocyte length and (B) Dufour's gland length were significantly  
636 different between newly emerged, lab-reared, and nesting females (oocytes:  $F_{4,89} =$   
637  $30.68$ ,  $r^2 = 0.58$ ,  $p < 4.79 \times 10^{-16}$ ; Dufour's:  $F_{4,101} = 45.80$ ,  $r^2 = 0.64$ ,  $p < 2.20 \times 10^{-16}$ ;  
638  $n =$  individual bees, newly emerged – 36, sugar – 14, sugar & pollen – 22, sugar,  
639 pollen & alfalfa – 14, reproductive – 20). Diet did not have a significant effect on  
640 reproductive development when newly emerged females were reared in the lab for  
641 10 d. Boxes represent the interquartile range, with the line as the median. Whiskers  
642 extend to 1.5 times the interquartile range. Circles are outliers. Letters indicate  
643 significant differences ( $p < 0.001$  in Tukey post-hoc tests). White boxes = newly  
644 emerged females, Grey boxes = lab-reared 10 d old females; Dark grey boxes =  
645 Reproductive, nesting females; Full model results are available in the supplementary  
646 materials.

647

648 **Figure 2. Effects of diet on oocyte maturation in alkali bees.** Newly emerged females  
649 had oocytes at significantly earlier stages of maturation than females in the other  
650 treatment groups (ordinal logistic regression:  $Z = -4.61$ ,  $p = 3.99 \times 10^{-6}$ ,  $n =$   
651 individual bees, newly emerged – 26, sugar – 11, sugar & pollen – 20, sugar, pollen  
652 & alfalfa – 10, reproductive – 7). Shading within bars indicates the proportion of  
653 maximum viable terminal oocytes in each stage of maturation, with stage I and II as  
654 pre-vitellogenic, III and IV as vitellogenic, and V as mature.

655

656 **Figure 3. Estimates of pollen grains in the hindguts of female bees.** There were no  
657 significant differences in hindgut pollen content between reproductive females and lab-  
658 reared females in posthoc tests ( $F_{2,15} = 3.32$ ,  $r^2 = 0.31$ ,  $p = 0.06$ ;  $n = 6$  bees per group).  
659 Boxes represent the interquartile range, with the line as the median. Whiskers extend to 1.5  
660 times the interquartile range.

661

662 **Figure 4. Effects of endocrine and social treatments on reproductive development in**  
663 **alkali bees.** (A) Maximum terminal oocyte length and (B) Dufour's gland length were  
664 significantly different between lab-reared females treated with JH versus controls,  
665 but variation in the social environment did not significantly affect reproductive  
666 development (oocytes:  $F_{5,41} = 6.68$ ,  $r^2 = 0.45$ ,  $p = 1.23 \times 10^{-4}$ ; Dufour's:  $F_{6,57} = 8.77$ ,  
667  $r^2 = 0.48$ ,  $p = 8.97 \times 10^{-7}$ );  $n =$  individual bees, sham/solitary – 12, sham/social – 12,  
668 DMF/solitary – 12; DMF/social – 10; JH/solitary – 10; JH/social – 8). Boxes represent  
669 the interquartile range, with the line as the median. Whiskers extend to 1.5 times  
670 the interquartile range. Circles are outliers. Letters indicate significant differences ( $p$   
671  $< 0.05$  in Tukey post-hoc tests). Grey bars = social treatment, white bars = solitary  
672 treatment; Full model results are available in the supplementary materials.

673

674 **Figure 5. Effects of JH on oocyte maturation in alkali bees.** There were significant  
675 differences in stage of oocyte maturation among JH treatment groups ( $\chi^2 = 23.20$ ,  $p$   
676  $= 7.31 \times 10^{-4}$ ,  $n =$  individual bees, sham – 16, DMF – 17, JH – 7). Shading within bars  
677 indicates the proportion of maximum viable terminal oocytes in each stage of  
678 maturation, with stage I and II as pre-vitellogenic, III and IV as vitellogenic, and V  
679 as mature.

680

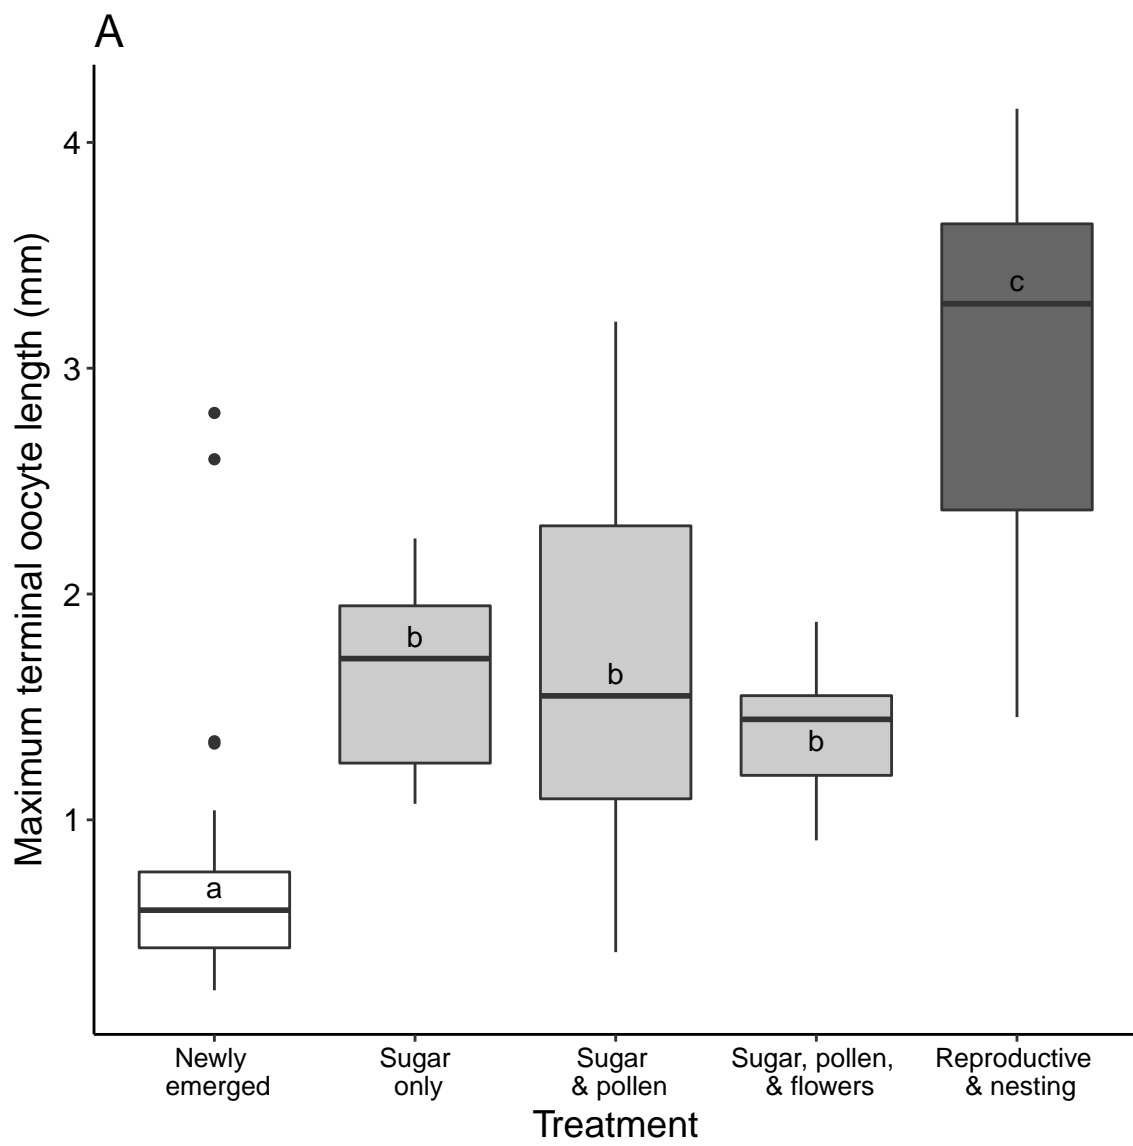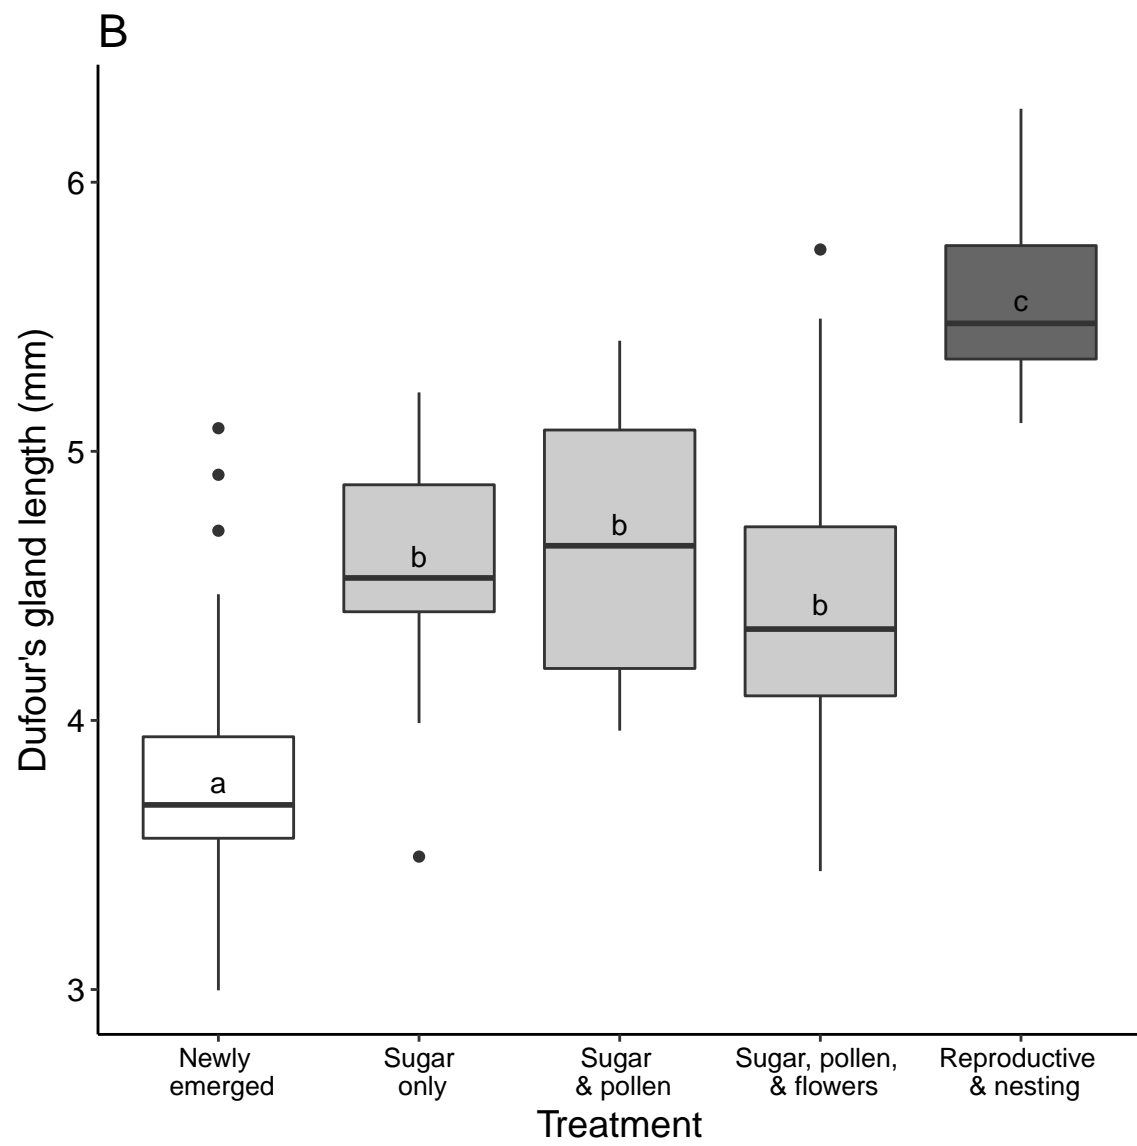

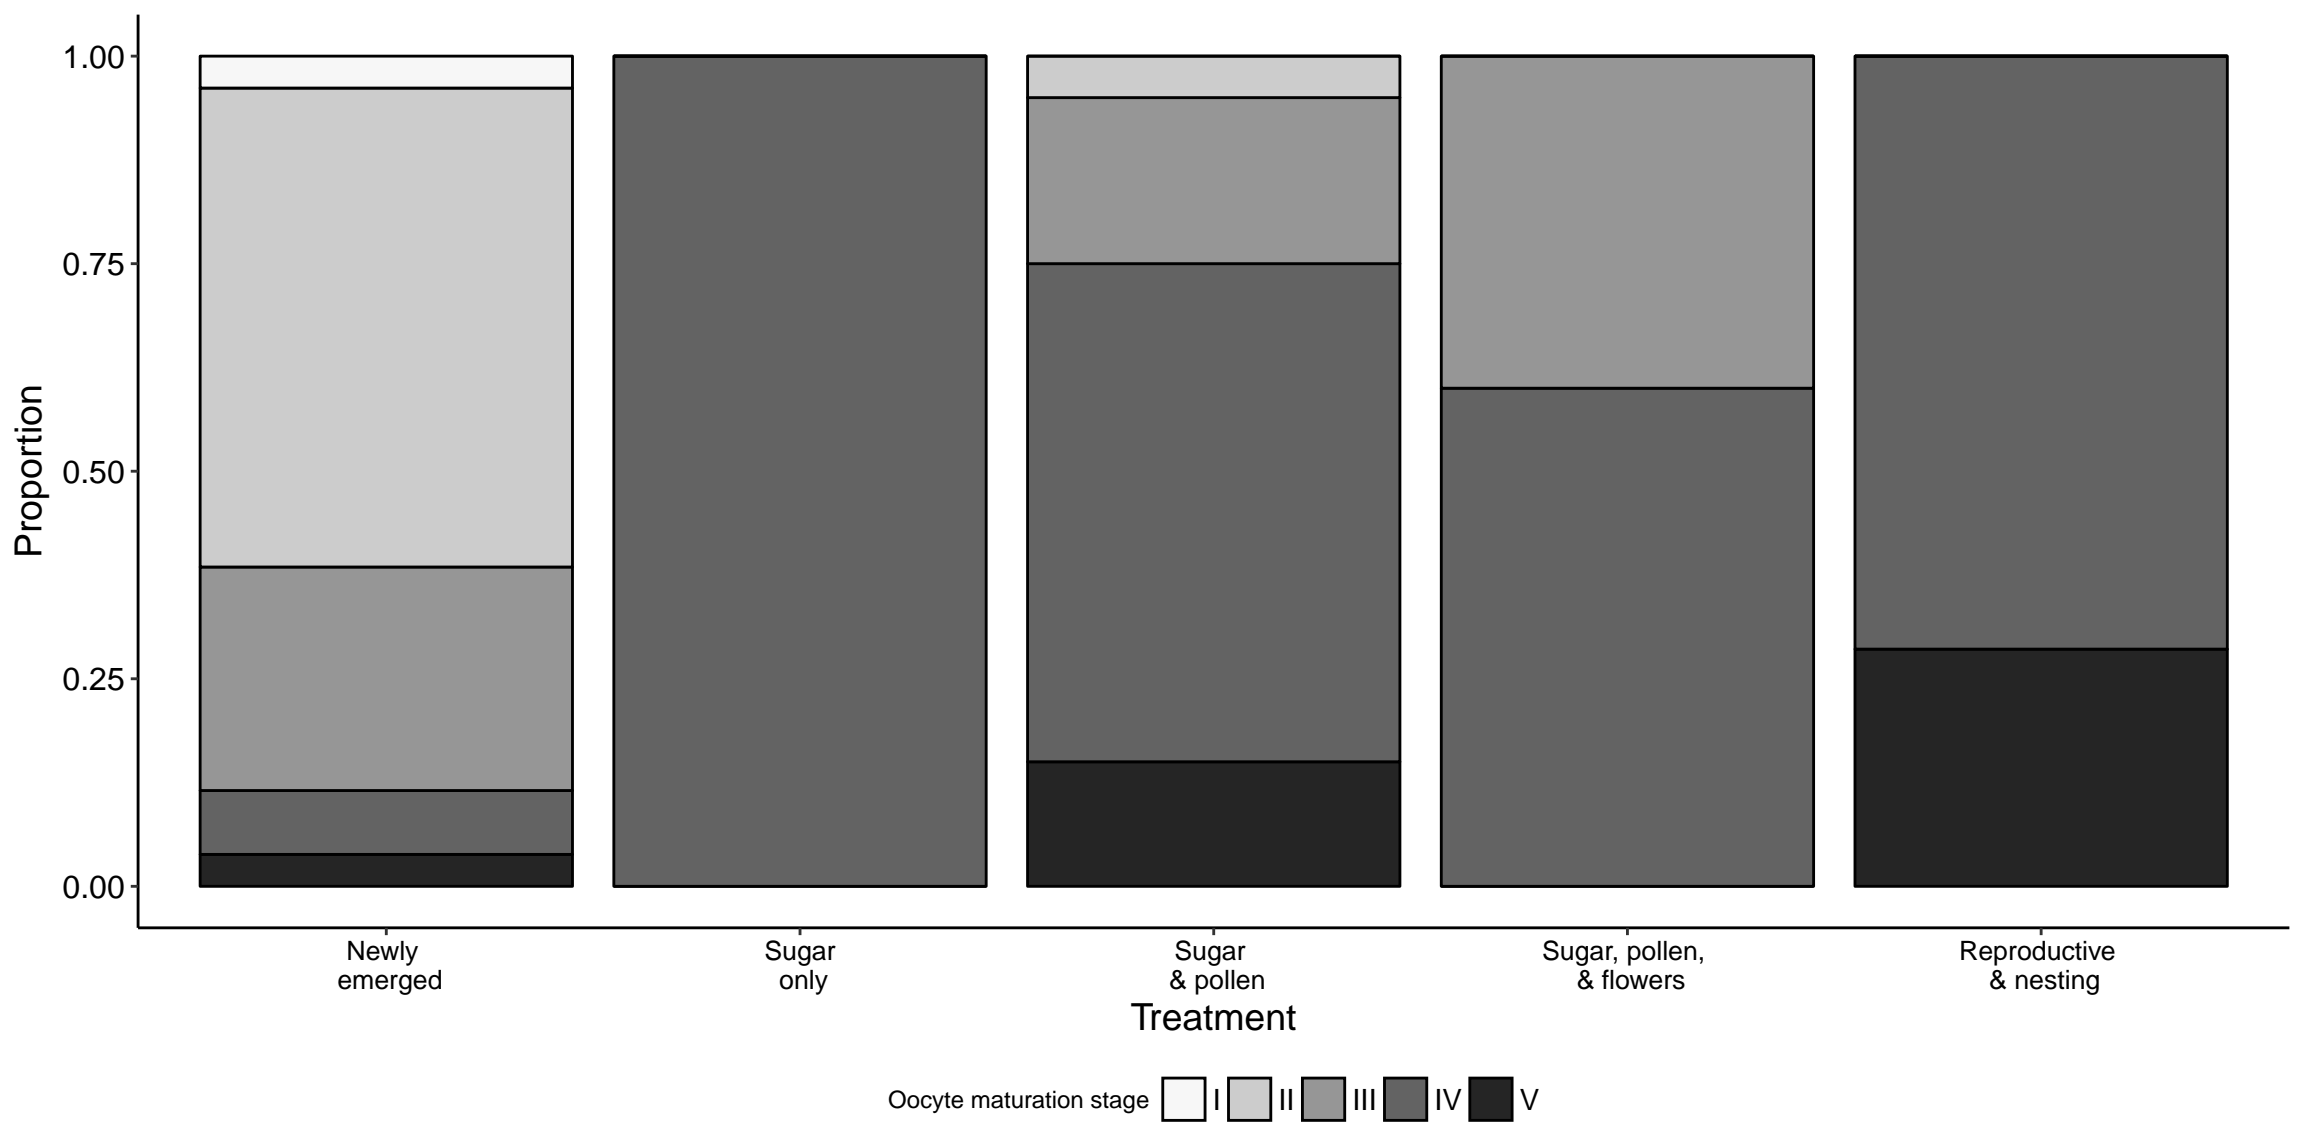

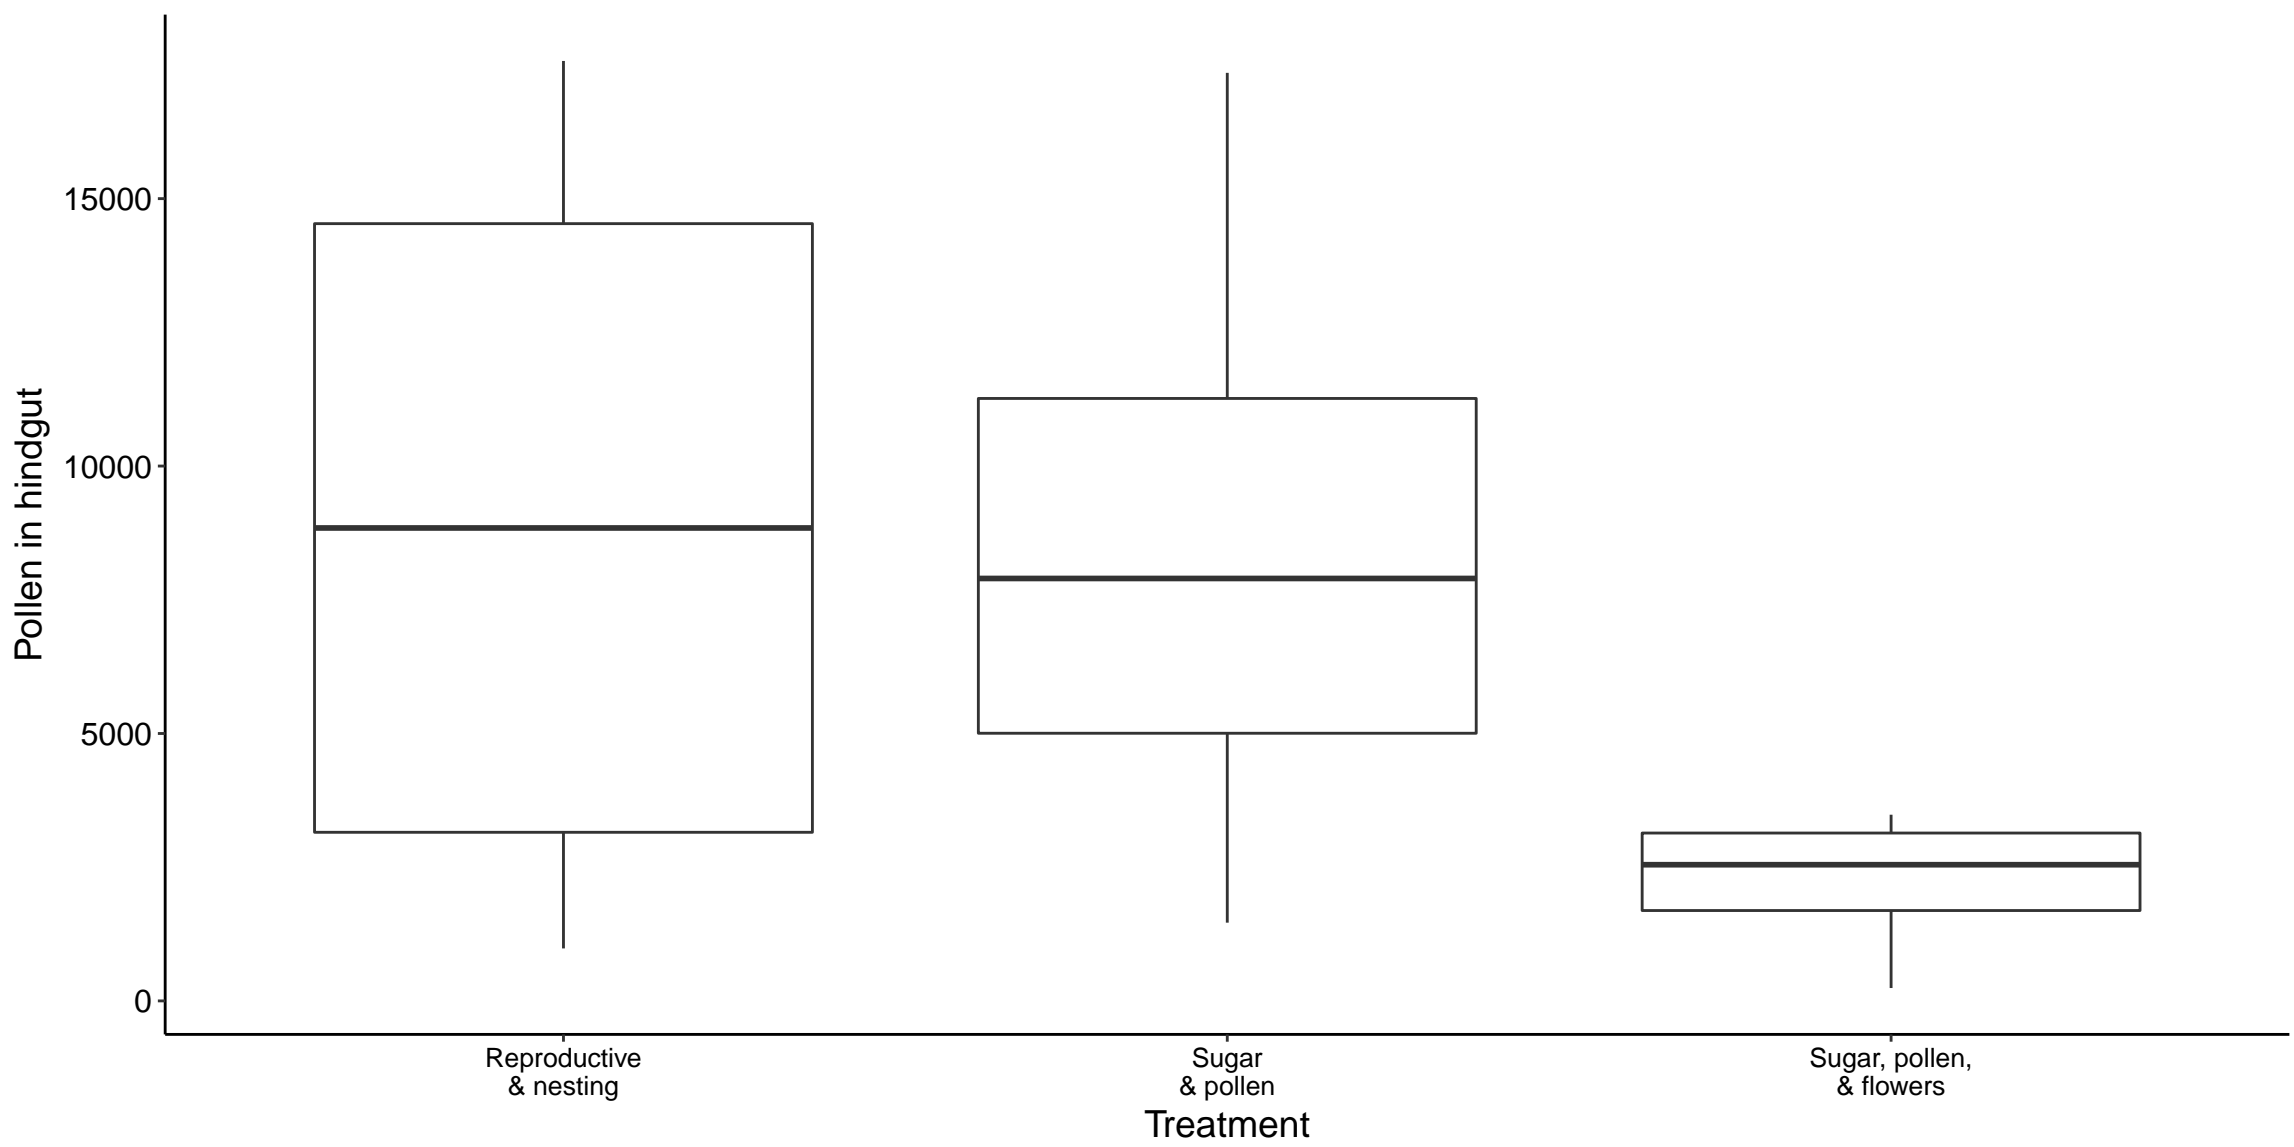

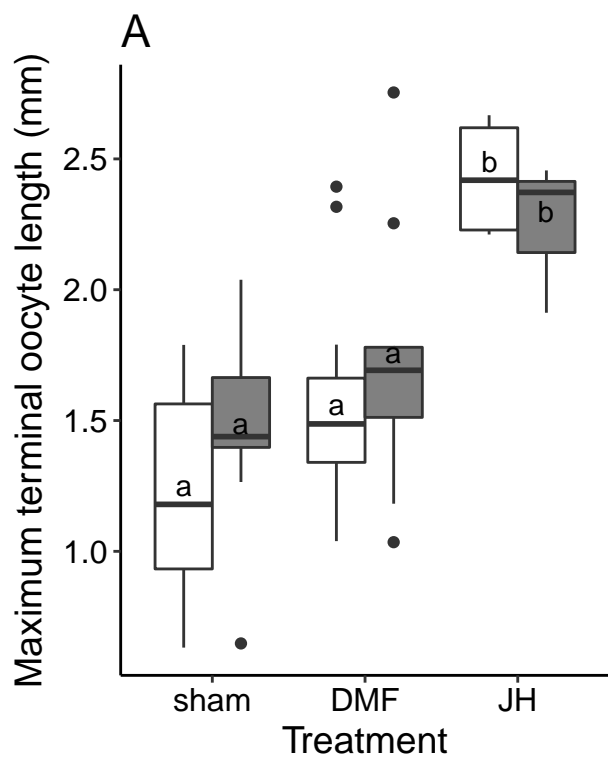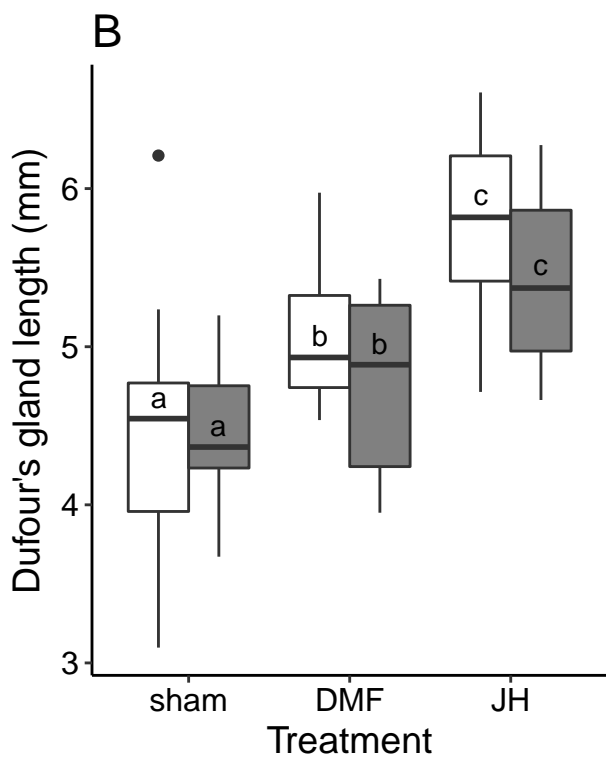



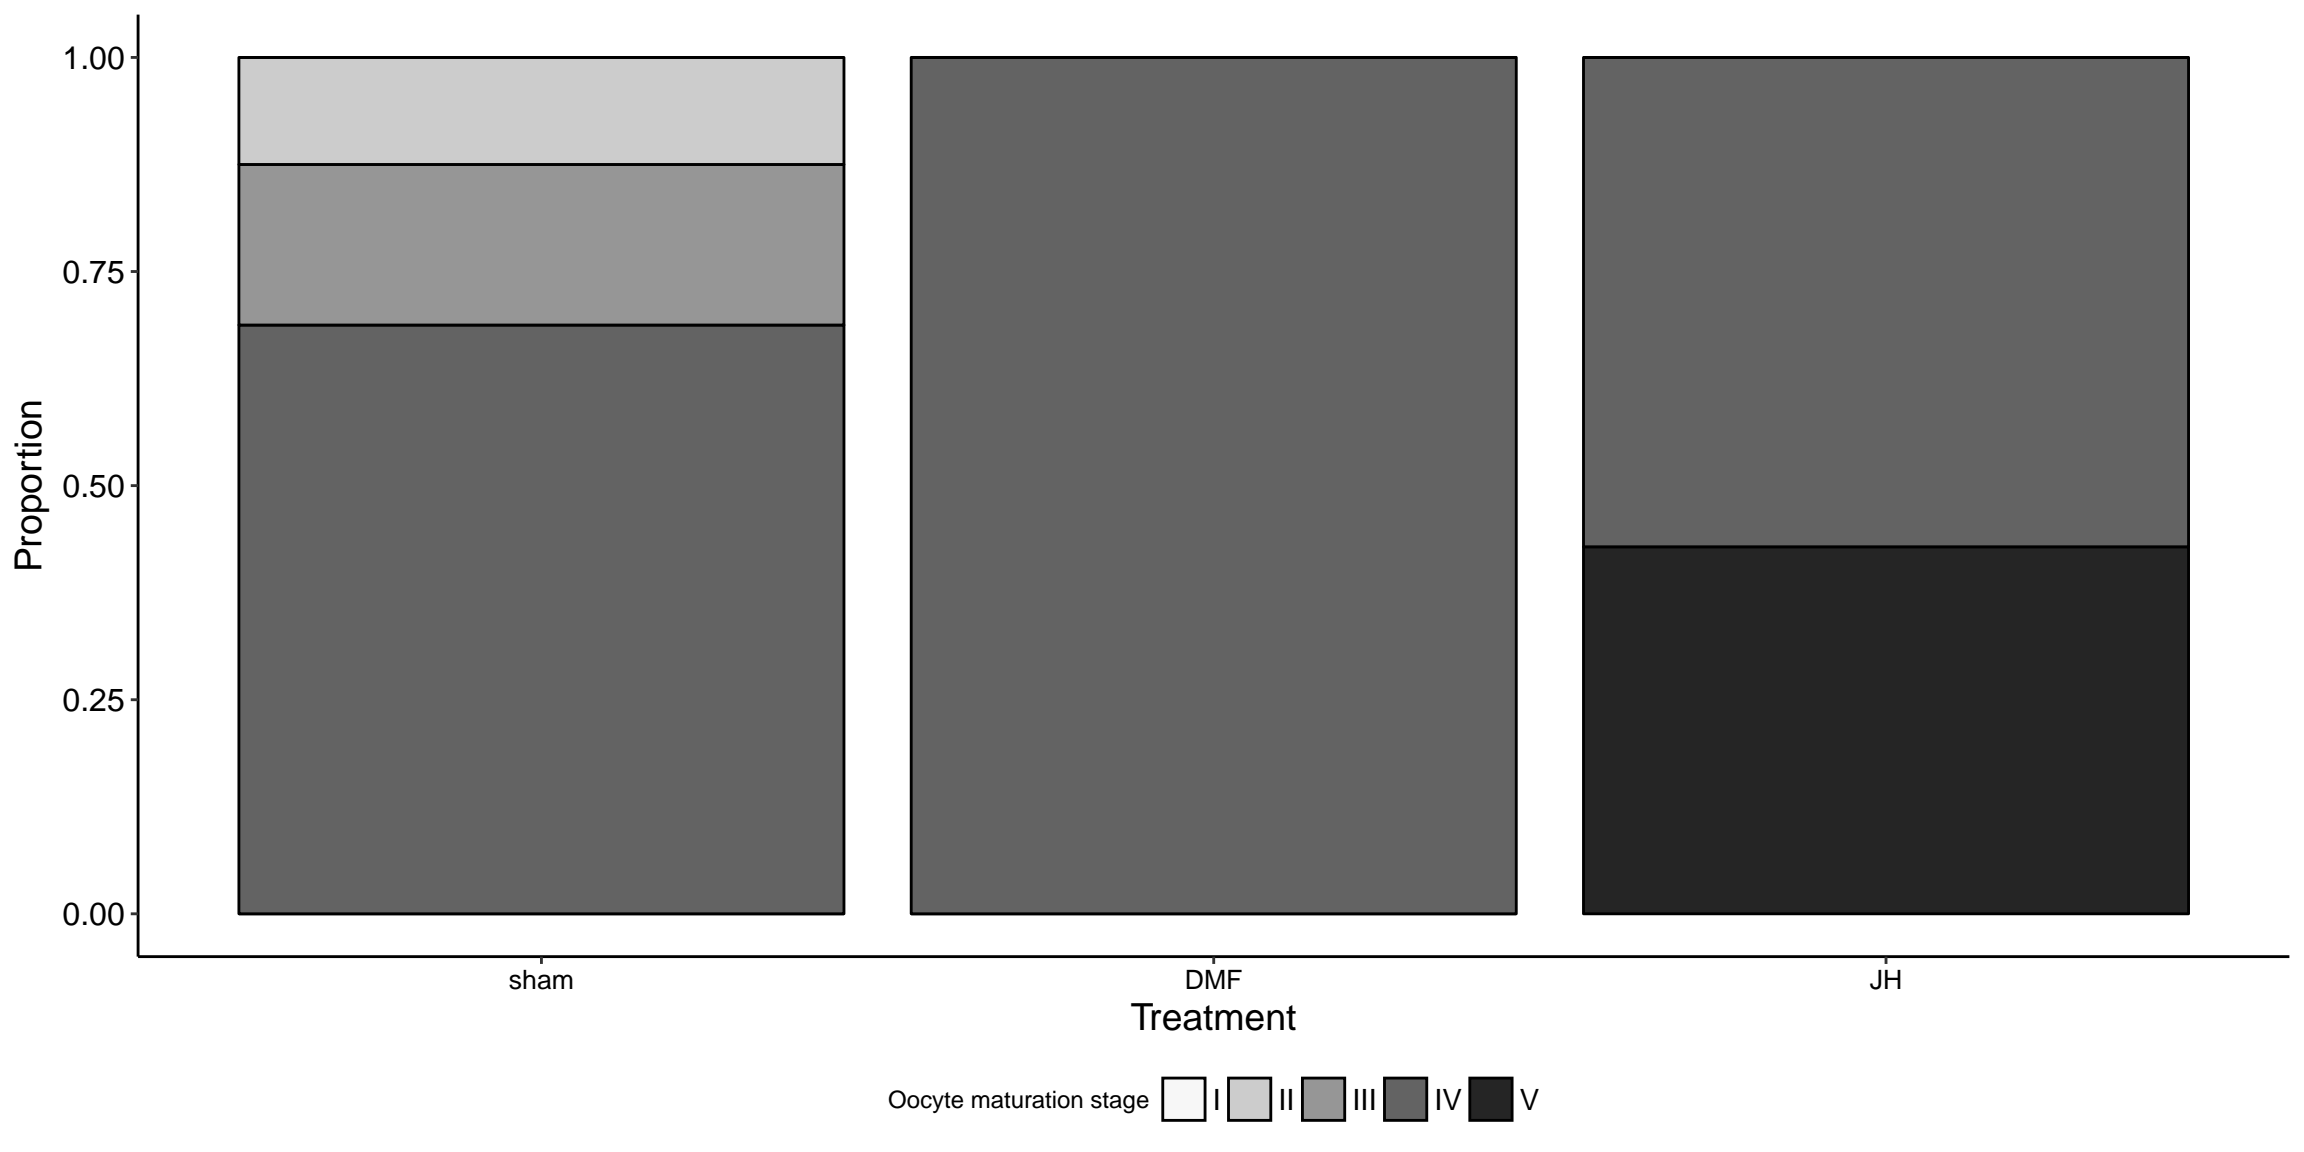

Source: http://biorxiv.org/content/10.1101/134387v2.full.pdf
